# Supplementary material for: Anterior insula regulates brain network transitions that gate conscious access
Source: PubMed Central journal article supplement — Cell Rep. Author manuscript; Available in PMC 2021 May 27. (PMC8157795; doi:10.1016/j.celrep.2021.109081), 2021-05-04
Supplement: NIHMS1700576-supplement-1.pdf [file NIHMS1700576-supplement-1.pdf]

**Cell Reports, Volume 35**

**Supplemental information**

**Anterior insula regulates brain network  
transitions that gate conscious access**

**Zirui Huang, Vijay Tarnal, Phillip E. Vlisides, Ellen L. Janke, Amy M. McKinney, Paul Picton, George A. Mashour, and Anthony G. Hudetz**

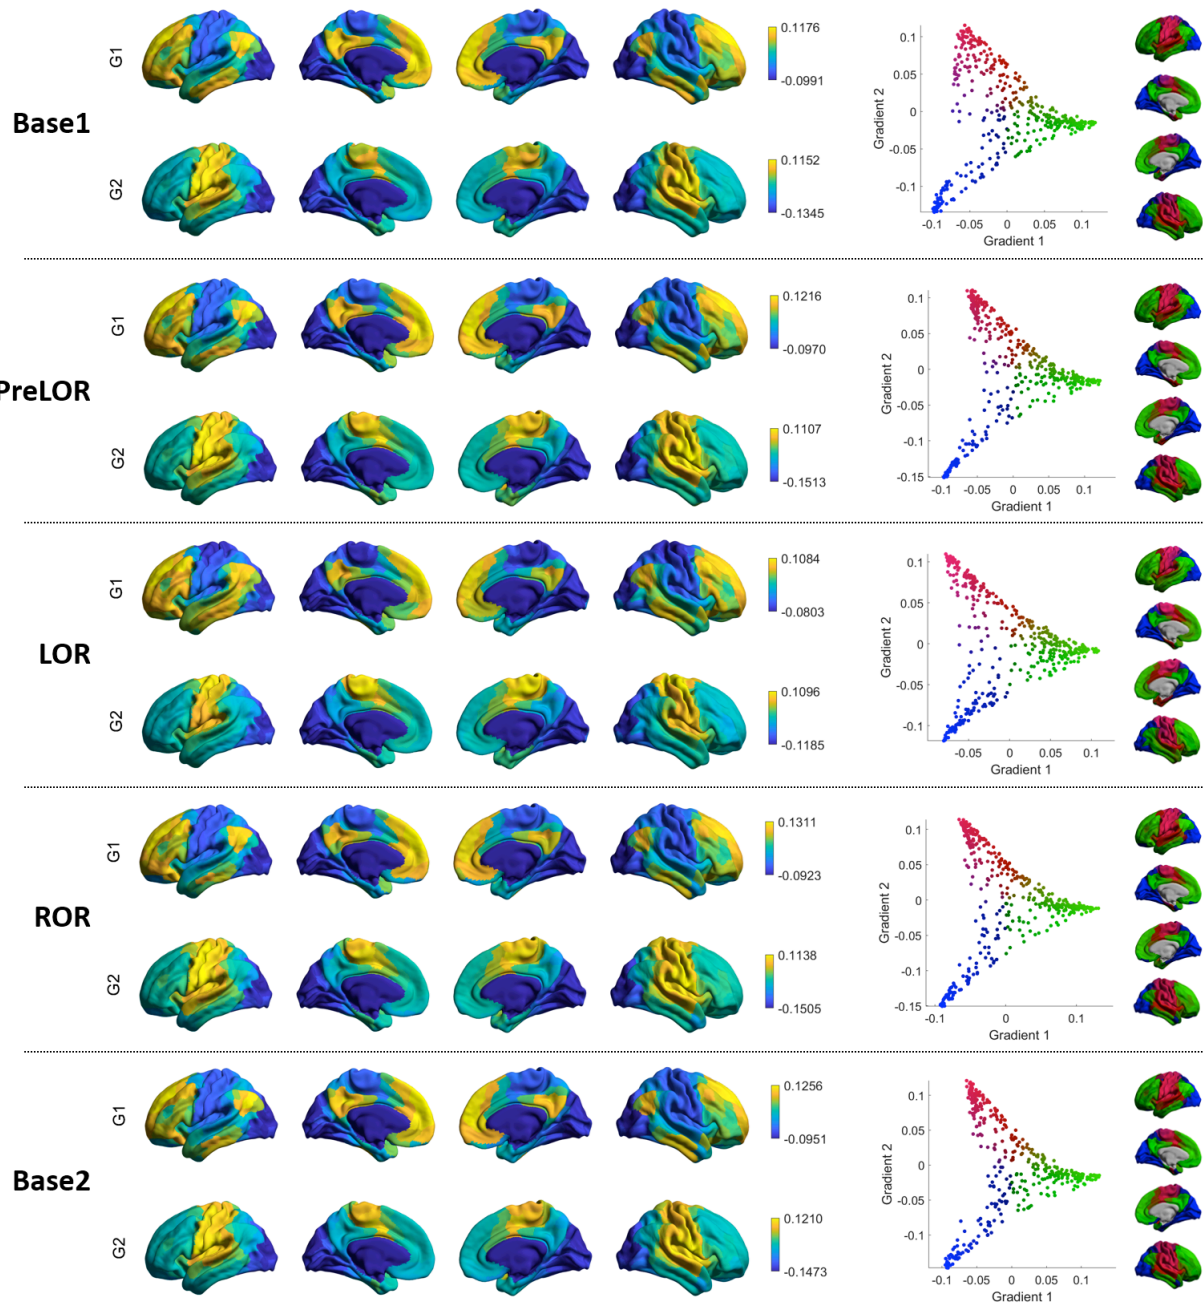

**Figure S1. Cortical gradients across different conditions.** Related to Figure 3. Left panel: topographic profiles of the first two gradients along the cortex. Right panel: the two gradients are projected into a 2-dimensional gradient space. The axes of the 2-dimensional space represent each gradient and separate distinct functional poles of cortical organization.

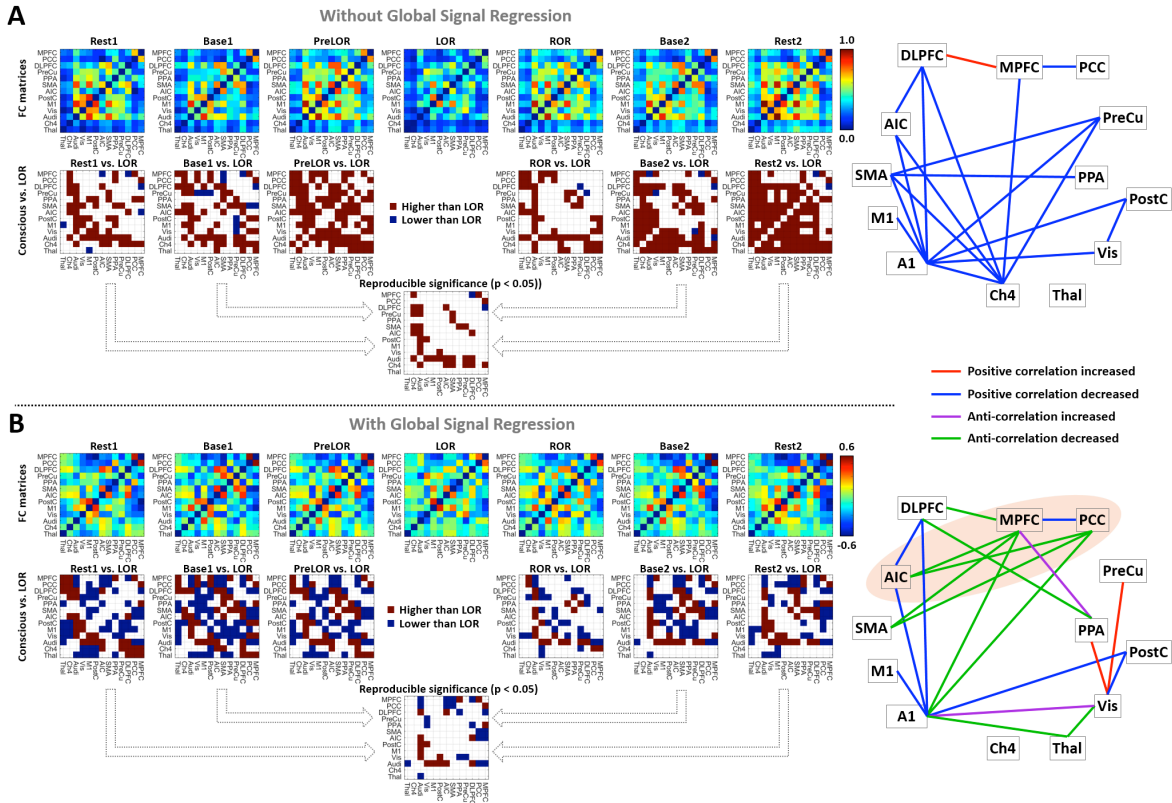

**Figure S2. Functional connectivity among brain regions.** Related to Figure 6. **(A)** Results without applying global signal regression (non-GSR). **(B)** Results after global signal regression (GSR). The time courses of fMRI signal change were extracted from the pre-defined ROIs for each condition, including Rest1 (n=26), Base1 (n=26), PreLOR (n=26), LOR (n=26), ROR (n=16), Base2 (n=25), and Rest2 (n=25). Qualitative estimation of functional connectivity was performed by calculating Pearson's correlation coefficient (Fisher's Z transformed) for each pair of ROIs. Individual pairwise functional connectivity matrices were generated for each condition. The reproducible differences across Rest1 vs. LOR, Base1 vs. LOR, Base2 vs. LOR, and Rest2 vs. LOR (two-sample paired sample t-tests; statistical significance at  $p < 0.05$ ) were considered as the genuine functional connectivity alterations during LOR (see connectivity matrix in lower, center position), with potential spurious functional connectivity driven by task-evoked activity accounted for. Schematics on the right summarize the effects of interest.

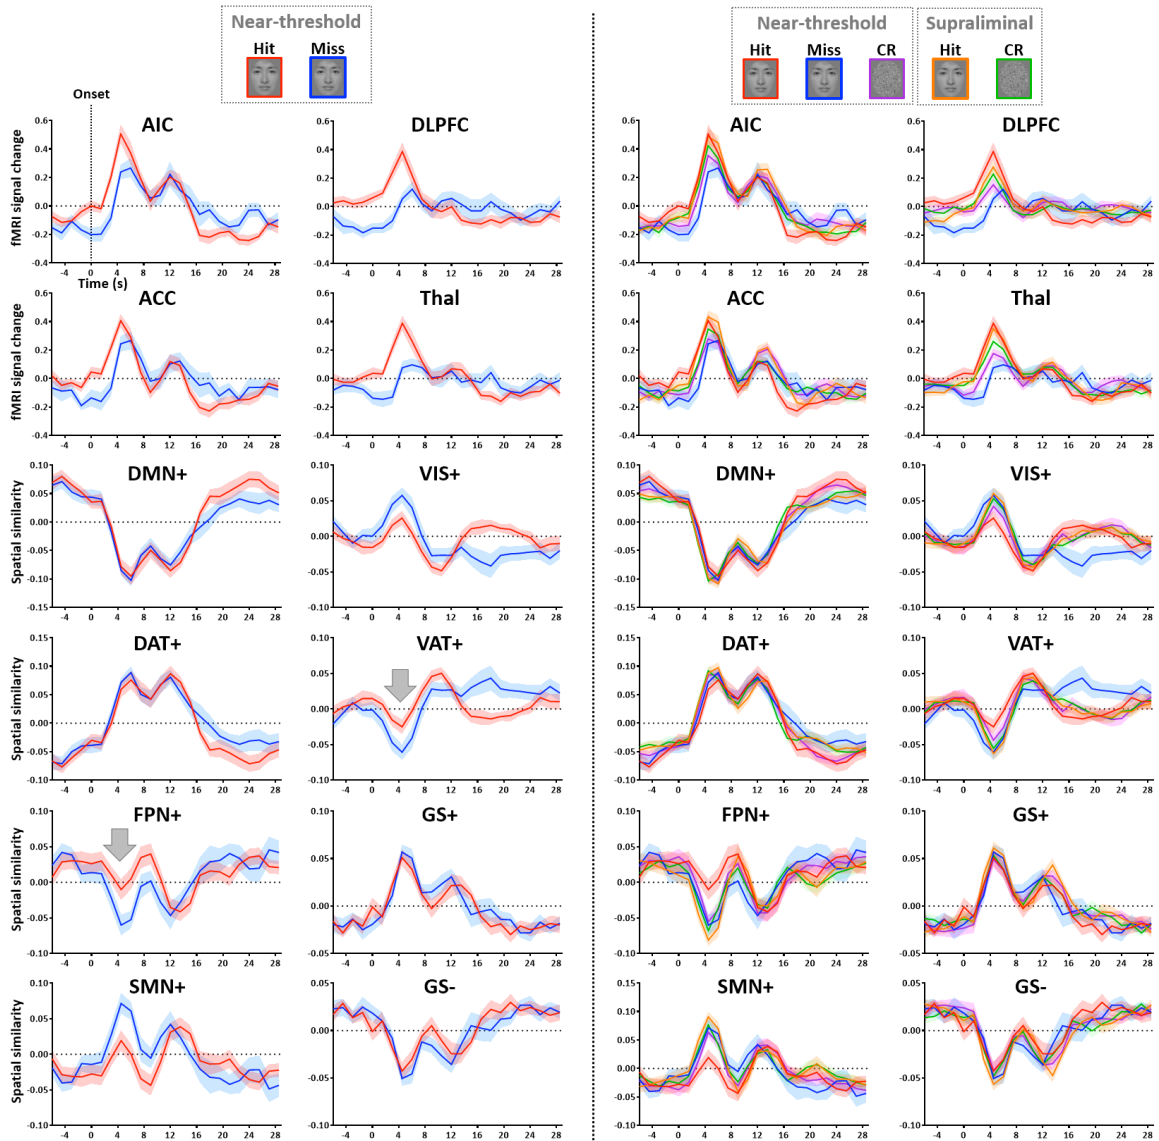

**Figure S3. Time course of fMRI signal change (and spatial similarity of CAPs) for supraliminal and near-threshold conditions.** Related to Figure 7. Five conditions were compared including near-threshold hit and miss, near-threshold correct rejection (CR), and supraliminal hit and correct rejection. AIC: anterior insular cortex; DLPFC: dorsal lateral prefrontal cortex; ACC: anterior cingulate cortex; Thal: thalamus. The co-activation patterns included the default-mode network (DMN+), dorsal attention network (DAT+), frontoparietal network (FPN+), somatomotor network (SMN+), visual network (VIS+), ventral attention network (VAT+), and global network of activation and deactivation (GN+ and GN-). Shaded areas indicate  $\pm$ SEM across subjects ( $n=19$ ).

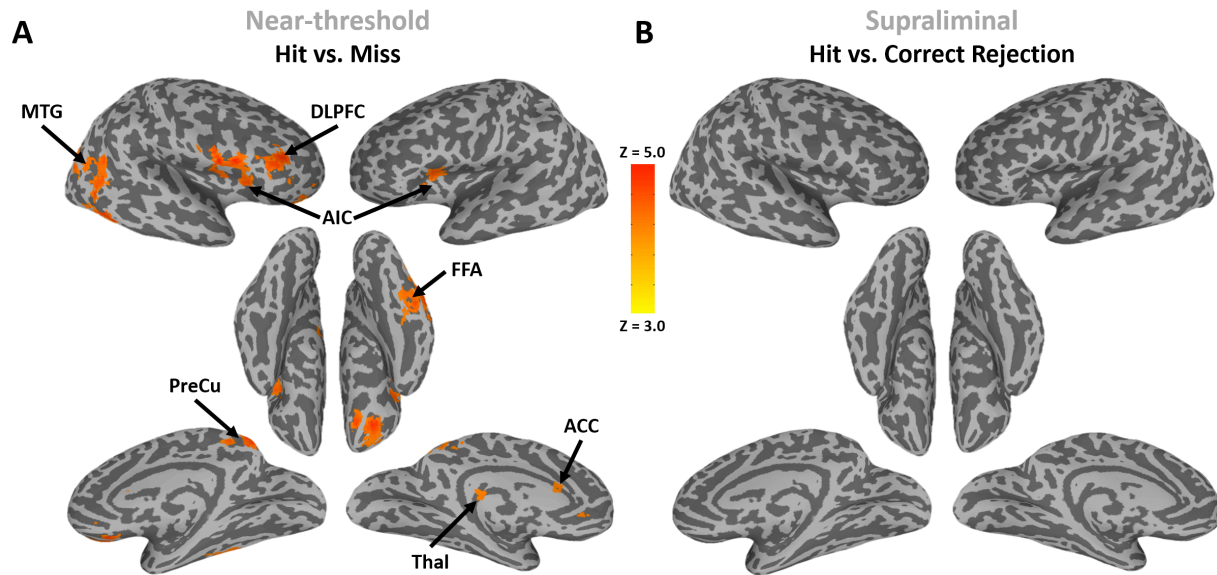

**Figure S4. Whole brain contrast at the stimulus onset.** Related to Figure 7. Group-level z-maps of fMRI signal intensity are shown for near-threshold hit vs. miss, and supraliminal hit vs. correct rejection (n=19). The z-maps were thresholded at cluster level  $\alpha < 0.05$ . AIC: anterior insular cortex; DLPFC: dorsal lateral prefrontal cortex; ACC: anterior cingulate cortex; Thal: thalamus; MTG: medial temporal gyrus; PreCu: precuneus; FFA: fusiform face area.

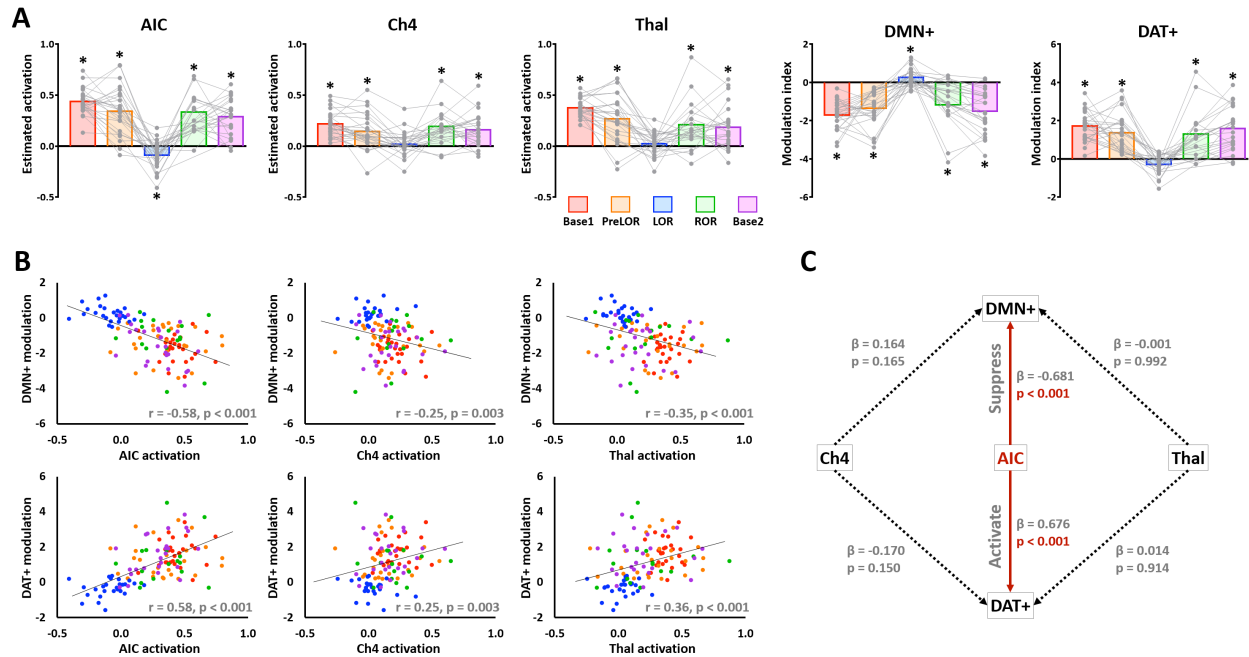

**Figure S5. Relationship between AIC, Ch4, Thal and DMN-DAT switch.** Related to Figure 6. **(A)** Instruction-evoked activation estimated from general linear model was plotted for AIC, Ch4 and Thal. Modulation indices were plotted for DMN+ and DAT+. Each grey dot represents an individual participant during Base1 ( $n=26$ ), PreLOR ( $n=26$ ), LOR ( $n=26$ ), ROR ( $n=16$ ), or Base2 ( $n=25$ ) connected by grey lines across conditions. Bars represent the group averages for each condition. \*indicates statistical significance (one sample t-tests against zero) at FDR-corrected  $\alpha < 0.05$ . **(B)** Pearson correlations ( $n=119$ ) between the regional activation (AIC, Ch4 and Thal) and large-scale network modulation (DMN+ and DAT+). **(C)** Results from multivariate linear regression analysis ( $n=119$ ) with the estimated activation in the AIC, Ch4 and Thal as independent variables, and the modulation indices in the DMN+ (and DAT+; analyzed separately) as dependent variables. Of the three independent variables tested, only AIC contributes with statistically significance to the DMN-DAT modulation.

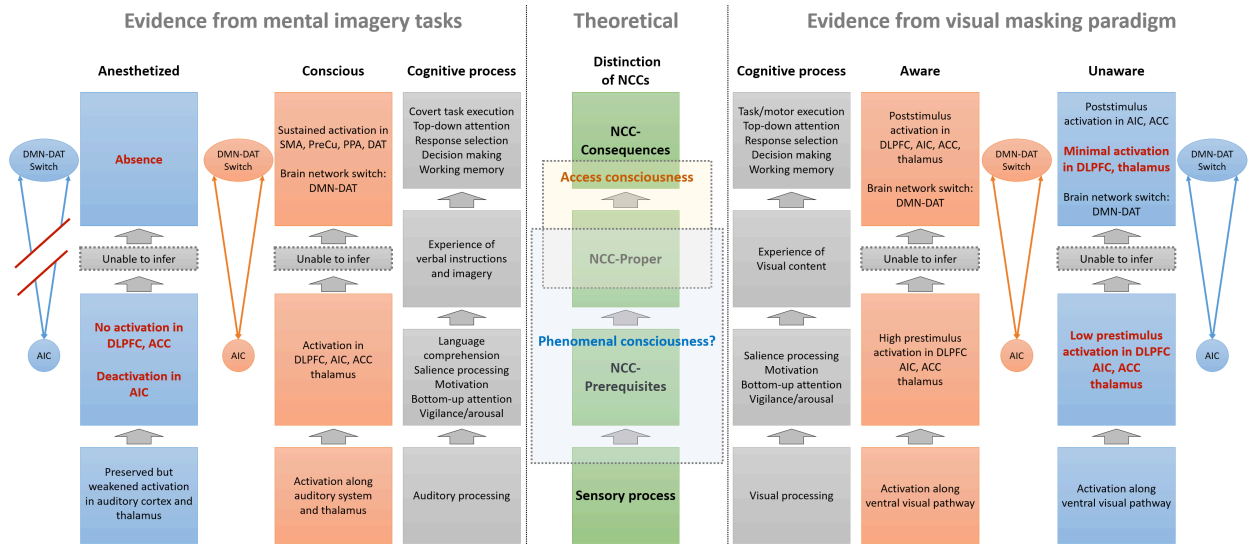

**Figure S6. Schematic illustration of the rationale of experimental design and interpretation with respect to the terminology and theoretical aspect of consciousness.** Related to Figure 4, Figure 5, Figure 6, and Figure 7. The middle column outlines different neural processes during conscious processing. The neural correlates of consciousness are theoretically dissociated from the prerequisites for and consequences of conscious processing (Aru et al., 2012). The left and right panels summarize the main results from the mental imagery and visual masking tasks. They are aligned to the presumed chains of cognitive processes and theoretical distinctions of NCCs.

**Table S1.** Summary of regions of interest. Related to Figure 3.

| Anatomic structures           | Abbreviations | BA | x [R] | y [P] | z [I] | z-value |
|-------------------------------|---------------|----|-------|-------|-------|---------|
| Right Middle Temporal Gyrus   | A1            | 21 | 59    | -13   | -7    | 7.90    |
| Left Superior Temporal Gyrus  | A1            | 21 | -58   | -19   | 2     | 7.66    |
| Right Middle Frontal Gyrus    | DLPFC         | 10 | 35    | 35    | 20    | 3.50    |
| Left Middle Frontal Gyrus     | DLPFC         | 10 | -34   | 44    | 8     | 3.44    |
| Left Insula                   | AIC           | 13 | -31   | 20    | 2     | 4.72    |
| Right Insula                  | AIC           | 13 | 32    | 17    | 2     | 4.28    |
| Left Precentral Gyrus         | M1            | 4  | -36   | -22   | 51    | 10.80   |
| Right Medial Frontal Gyrus    | MPFC          | 8  | 8     | 56    | 8     | -4.07   |
| Right Cingulate Gyrus         | PCC           | 23 | 5     | -49   | 26    | -3.22   |
| Left Precuneus                | PPA           | 31 | -13   | -64   | 23    | 2.95    |
| Right Posterior Cingulate     | PPA           | 30 | 23    | -58   | 17    | 3.07    |
| Right Postcentral Gyrus       | PostC         | 5  | 20    | -43   | 65    | -3.18   |
| Left Postcentral Gyrus        | PostC         | 5  | -22   | -37   | 68    | -2.98   |
| Left Precuneus                | PreCu         | 7  | -7    | -70   | 41    | 4.77    |
| Right Precuneus               | PreCu         | 7  | 11    | -70   | 41    | 4.25    |
| Left Medial Frontal Gyrus     | SMA           | 6  | -4    | 2     | 50    | 6.84    |
| Right Middle Occipital Gyrus  | Vis           | 18 | 41    | -82   | 2     | -3.55   |
| Left Inferior Occipital Gyrus | Vis           | 18 | -37   | -85   | -4    | -3.38   |

BA: Brodmann area; Talairach coordinates are provided for the peak voxel in a given region.
